# Supplementary material
Source: PubMed Central journal article supplement (PMC3173203)
Supplement: supp_M111.269399_jbc.M111.269399-1.pdf [file supp_M111.269399_jbc.M111.269399-1.pdf]

## Supplemental Information for:

### Arrested oocyst maturation in *Plasmodium* parasites lacking type II NADH:ubiquinone dehydrogenase

Katja E. Boysen and Kai Matuschewski

#### Contents:

- **Supplemental Movies 1 and 2**
- **Supplemental Figures 1 – 6**
- **Supplemental Reference**
- **Supplemental Table 1**

**Supplemental Movie 1:** Representative gliding motility of two *ndh2(-)* ookinetes in Matrigel. Time lapse is indicated (upper right). Spherical bodies: p28-labelled magnetic beads (Dynabeads) used for purification of ookinetes.

**Supplemental Movie 2:** Representative gliding motility of two wild type ookinetes in Matrigel. Time lapse is indicated (upper right). Spherical bodies: p28-labelled magnetic beads (Dynabeads) used for purification of ookinetes.

Boysen, Suppl. Figure 1

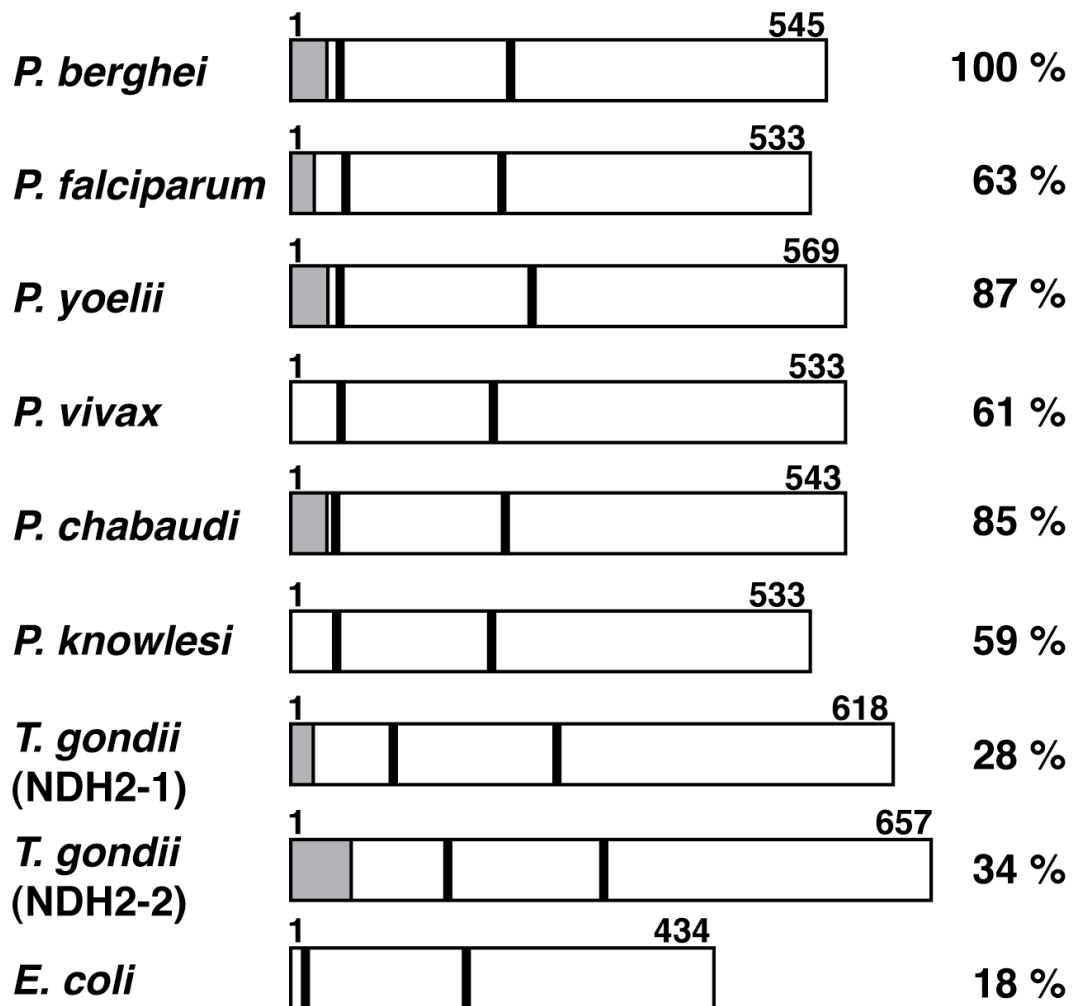

**Supplemental Figure 1: Primary structure of the type II NADH:oxidoreductases (NDH2).**

Shown are the overall sequence structures and amino acid sequence identities (%) of NDH2 orthologs in *Plasmodium falciparum* (gi:124506848), *P. yoelii* (gi:83318041), *P. vivax* (gi:156097305), *P. chabaudi* (gi:70935187), *P. knowlesi* (gi:221054565), *Toxoplasma gondii* (NDH2-1, gi: 237840755; NDH2-2, gi: 78057337) and *Escherichia coli* (gi: 16129072) in comparison to the predicted *P.berghei* protein (gi:68062086). Mitochondrial targeting sequences (MitoProt (1)) and signature GxGxxG motives are displayed as grey boxes and black bars, respectively. The N-terminal GxGxxG motif most likely binds flavin, while the more C-terminal GxGxxG motif is expected to bind NADH.

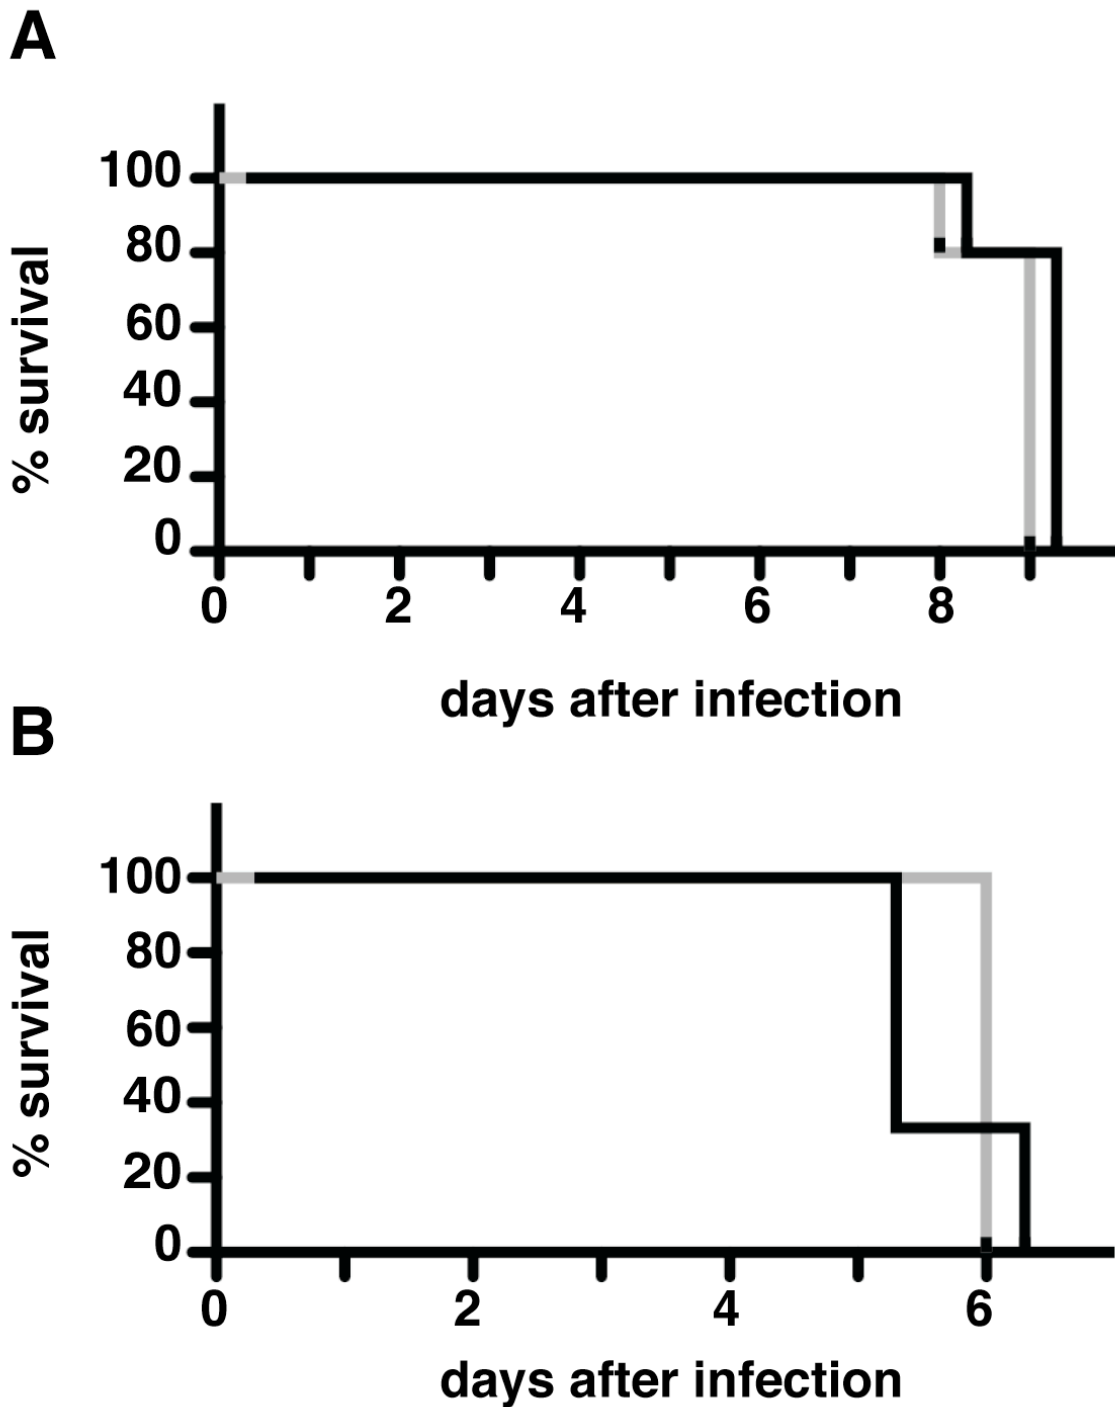

**Supplemental Fig. 2: Animals infected with *ndh2*<sup>-</sup> parasites develop signature symptoms of experimental cerebral malaria.**

Shown is a Kaplan-Meier survival analysis of C57bl/6 mice infected with WT (ANKA-GFP, grey line) and *ndh2*<sup>-</sup> (black line) parasites after injection of 1,000 (A) and 1,000,000 (B) blood stage parasites. N = 5 (A) and 3 (B), respectively.

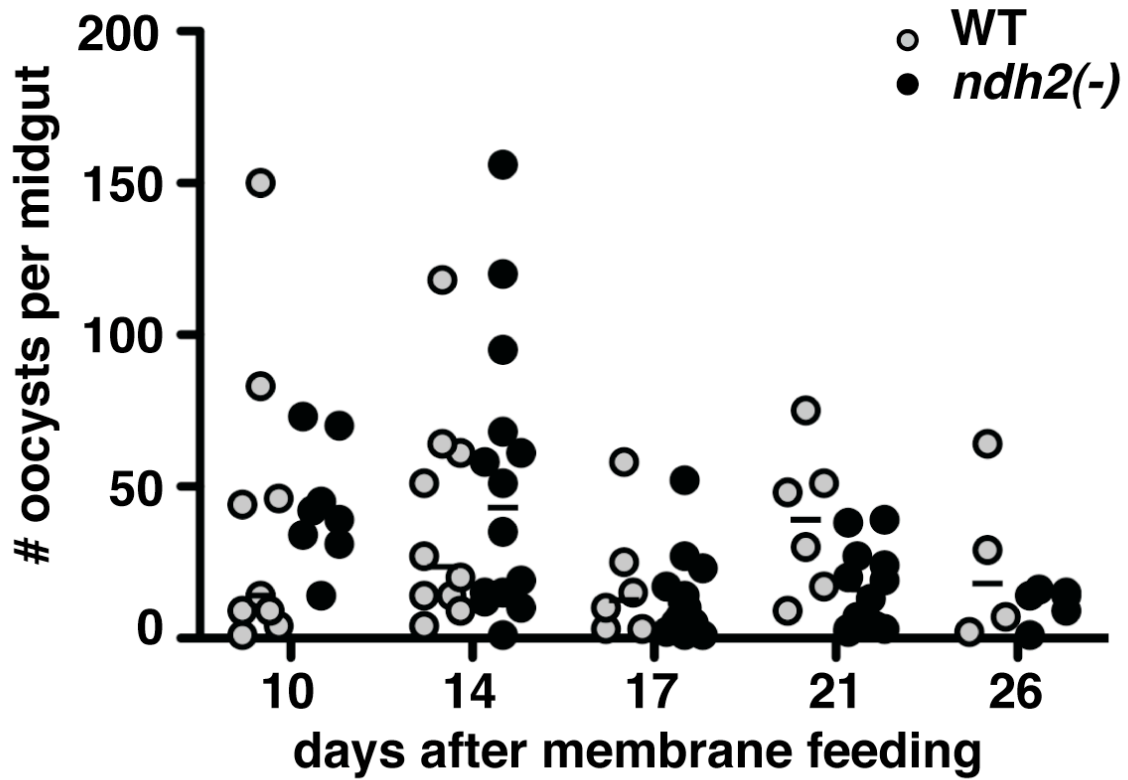

**Supplemental Fig. 3: Oocyst load after membrane feeding of cultured *ndh2(-)* and WT ookinetes.**

Oocysts were scored from infected midguts between day 10 and day 26 after infection with WT (grey) or *ndh2(-)* (black) parasites. *ndh2(-)* data are based on two feedings with ko1 and ko2 ookinetes. The median is indicated. The Mann-Whitney test was applied for each day shown and revealed no significant differences in oocyst numbers.

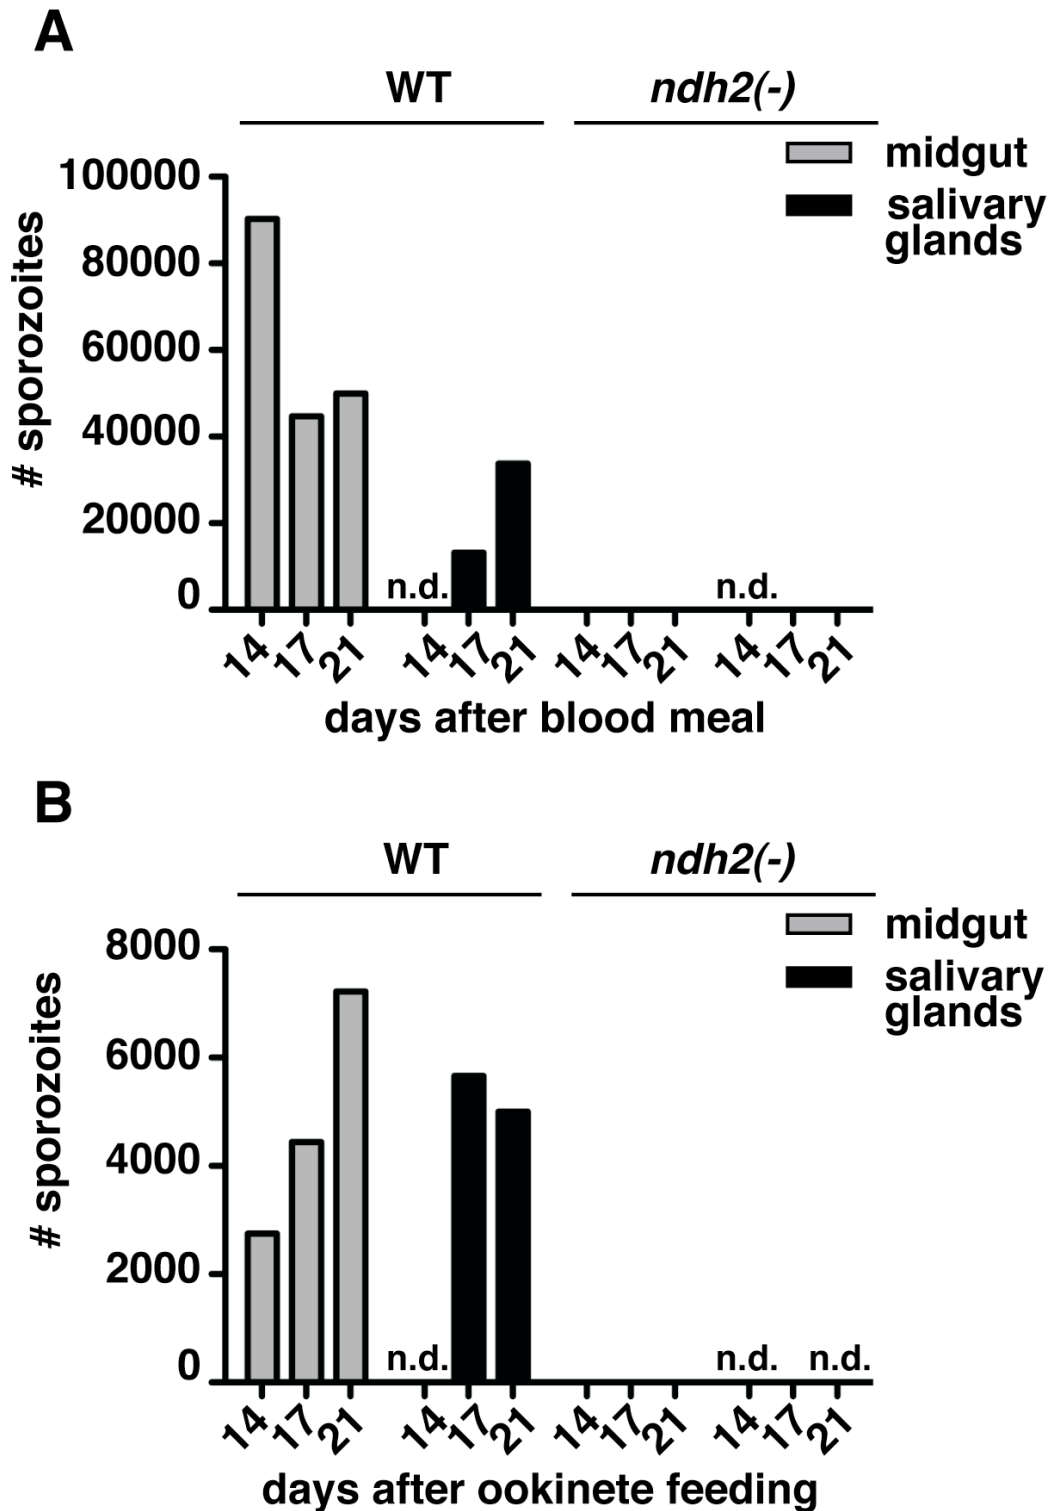

**Supplemental Fig. 4: *ndh2(-)* oocysts do not develop into sporozoites.**

Sporozoites isolated from oocysts or salivary glands were counted after a blood meal (A) or membrane feeding of cultured ookinetes (B). *ndh2(-)* data are based on two independent feedings with ko1 and ko2 parasites. Shown are the numbers of sporozoites isolated from 20 mosquitoes, normalized to infectivity.

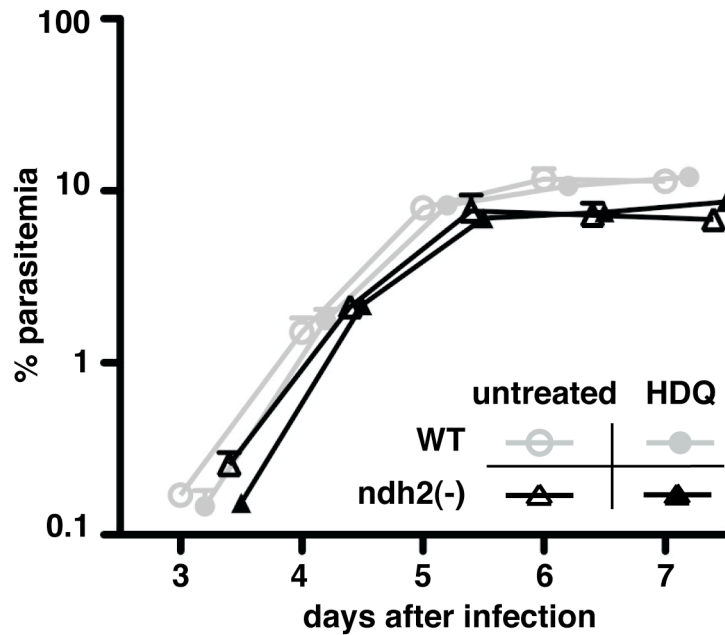

**Supplemental Fig. 5: *ndh2(-)* parasites in combination with HDQ treatment cause high-level parasitemia *in vivo*.**

Displayed are *in vivo* growth curves of WT (grey) and *ndh2(-)* (black) parasites, either under treatment with 50 mg/kg body weight HDQ (filled symbols) or untreated (open symbols). Animals (n=3) were injected intravenously with 1,000,000 asexual parasites of the respective parasite populations. HDQ was injected daily, starting on the second day of infection. Parasitemia was determined every 24 hours by microscopic examination of Giemsa-stained blood smears.

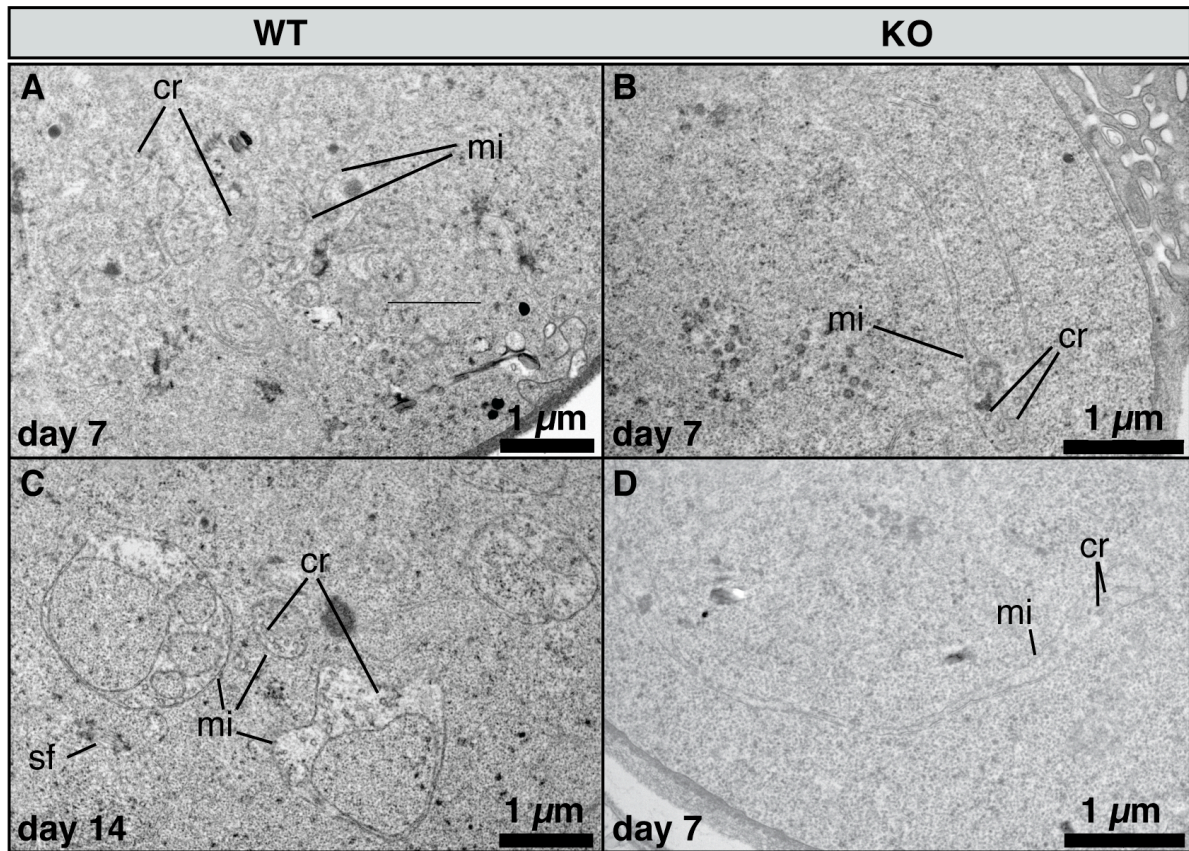

**Supplemental Fig. 6: Mitochondria in both WT and *ndh2(-)* oocysts are elongated, branched and cristate.**

Transmission electron microscopy on immature oocysts. **A** and **B** are close ups of pictures shown in **Fig. 6**. cr: cristae, mi: mitochondrion, sf: spindle fibers

**Supplemental Reference:**

1. Claros, M. G., and Vincens, P. (1996) *Eur. J. Biochem.* **241**, 779-786

**Supplemental Table 1: Nucleotide primers used in this study**

| Experiment                          | Oligonucleotide                 | Sequence 5' → 3'                                 | Restriction site |
|-------------------------------------|---------------------------------|--------------------------------------------------|------------------|
| RT qPCR                             | ndh2(-)GFP for                  | acacacctttgcatggtaac                             |                  |
|                                     | ndh2(-)GFP rev                  | tgttggccatggaacaggtag                            |                  |
|                                     | NDH2 for                        | gttatttaggatcaggatggggtg                         |                  |
|                                     | NDH2 rev                        | cactacataaacaaggtaacaaaggag                      |                  |
|                                     | GFP for                         | gatggaagcgttcaactagcagacc                        |                  |
|                                     | GFP rev                         | agctgttacaactcaagaaggacc                         |                  |
|                                     | Hsp70 for                       | aagaagctgaagctgatgctctcc                         |                  |
|                                     | Hsp70 rev                       | agttcatacctcctggcattctcc                         |                  |
|                                     | Qarts for                       | gagaggggaagaaatattatcagg                         |                  |
|                                     | Qarts rev                       | gagcactctctaaacctatacc                           |                  |
|                                     | G3PDH for                       | gttggaacaacagatgaacagcgtcc                       |                  |
|                                     | G3PDH rev                       | ctaaaggctgaaatccacaccaagcag                      |                  |
|                                     | DHOD for                        | gcctctagttttgtaaattggctc                         |                  |
|                                     | DHOD rev                        | cactgactcctcctttttatcttcg                        |                  |
|                                     | MQO for                         | gaatatagttgttacctgtggcagg                        |                  |
|                                     | MQO rev                         | cagctgcaaattggcaatgctg                           |                  |
| SucDH for                           | gatcggattggctaggtgatcag         |                                                  |                  |
| SucDH rev                           | gcttgcctcctttaccgt              |                                                  |                  |
| <b>ndh2(-)<br/>vector</b>           | 5' KO flank for <sup>a</sup>    | atcaagc <b>actagtt</b> ctaattgtgcgtggtatac       | <i>SpeI</i>      |
|                                     | 5' KO flank rev                 | caatata <b>catatg</b> ttaacctgcaaaggtgtg         | <i>NdeI</i>      |
|                                     | 3' KO flank for                 | <b>taagctt</b> ggccattctactgatctgacatgttag       | <i>HindIII</i>   |
|                                     | 3' KO flank rev <sup>b</sup>    | <b>taggtacc</b> gtacaaatccgagctttccctc           | <i>KpnI</i>      |
| <b>ndh2(-)<br/>test</b>             | 5' integration for              | aacctgaaagggtagaaagatgtccatcac                   |                  |
|                                     | 5' integration rev              | cccgcacggacgaatccagatgg                          |                  |
|                                     | 3' integration for              | cgcattatatgagttcattttacacaatcc                   |                  |
|                                     | 3' integration rev              | atattcaggaaaggatatacacatgtcgtc                   |                  |
|                                     | WT for <sup>c</sup>             | ggag <b>cgggccg</b> caaattctttaataataaaag<br>gag | <i>NotI</i>      |
|                                     | WT rev <sup>d</sup>             | catgt <b>cactagt</b> gtagaatggcctacc             | <i>SpeI</i>      |
| <b>NDH2_<br/>mCherry<br/>vector</b> | NDH2mCherry<br>for <sup>c</sup> | ggag <b>cgggccg</b> caaattctttaataataaaag<br>gag | <i>NotI</i>      |
|                                     | NDH2mCherry<br>rev <sup>d</sup> | catgt <b>cactagt</b> gtagaatggcctacc             | <i>SpeI</i>      |
| <b>NDH2_<br/>mCherry<br/>test</b>   | 5' integration for <sup>a</sup> | atcaagc <b>actagtt</b> ctaattgtgcgtggtatac       | <i>SpeI</i>      |
|                                     | 5' integration rev              | cagcttcaagtagtcggggatgtcg                        |                  |
|                                     | WT for <sup>a</sup>             | atcaagc <b>actagtt</b> ctaattgtgcgtggtatac       | <i>SpeI</i>      |
|                                     | WT rev <sup>b</sup>             | <b>taggtacc</b> gtacaaatccgagctttccctc           | <i>KpnI</i>      |

Oligonucleotides used for two applications are labeled <sup>a-d</sup>.
